# Supplementary material for: Dysregulated aldosterone secretion in persons of African descent with endothelin-1 gene variants
Source: JCI journal article supplement (doi:10.1172/jci.insight.95992), 2017-12-06
Supplement: sd1 [file 1]

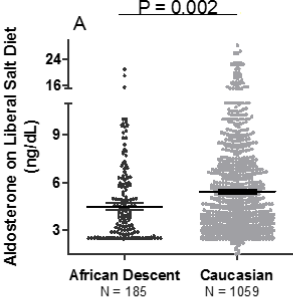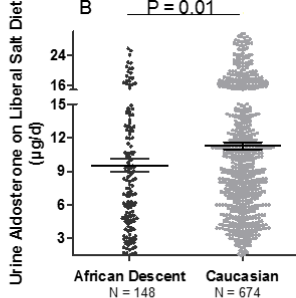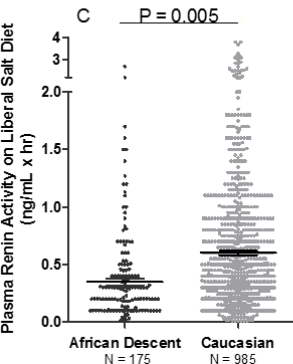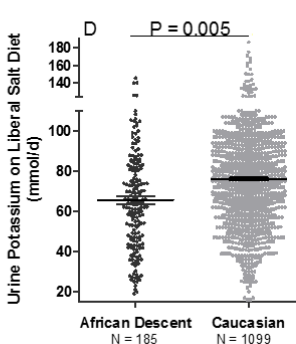

### Supplemental Figure 1:

Comparison in Caucasian and African Descent subjects of aldosterone [supine serum (A) and 24-hour urine (B)], plasma renin activity (C) and urine potassium levels (D) on a liberal salt diet. Multivariate regression models for plasma renin activity and urine potassium were adjusted for age, sex, body mass index, site and disease state. The models for aldosterone were adjusted for age, sex, body mass index, site, disease state, serum cortisol, 24-hour urine potassium and plasma renin activity. Data are represented in a dot-plot with the mean  $\pm$  SEM. The subjects were from the entire HyperPATH cohort (PRA = plasma renin activity).
